# Supplementary material
Source: PubMed Central journal article supplement (PMC3903362)
Supplement: tjp0592-0229-sd1.pdf [file tjp0592-0229-sd1.pdf]

SUPPLEMENTAL FIGURE

**Kv3.3 channels harboring a mutation of spinocerebellar ataxia type 13 alter excitability and induce cell death in cultured cerebellar Purkinje cells**

Tomohiko Irie, Yasunori Matsuzaki, Yuko Sekino, and Hirokazu Hirai

**Supplemental Fig. S1**

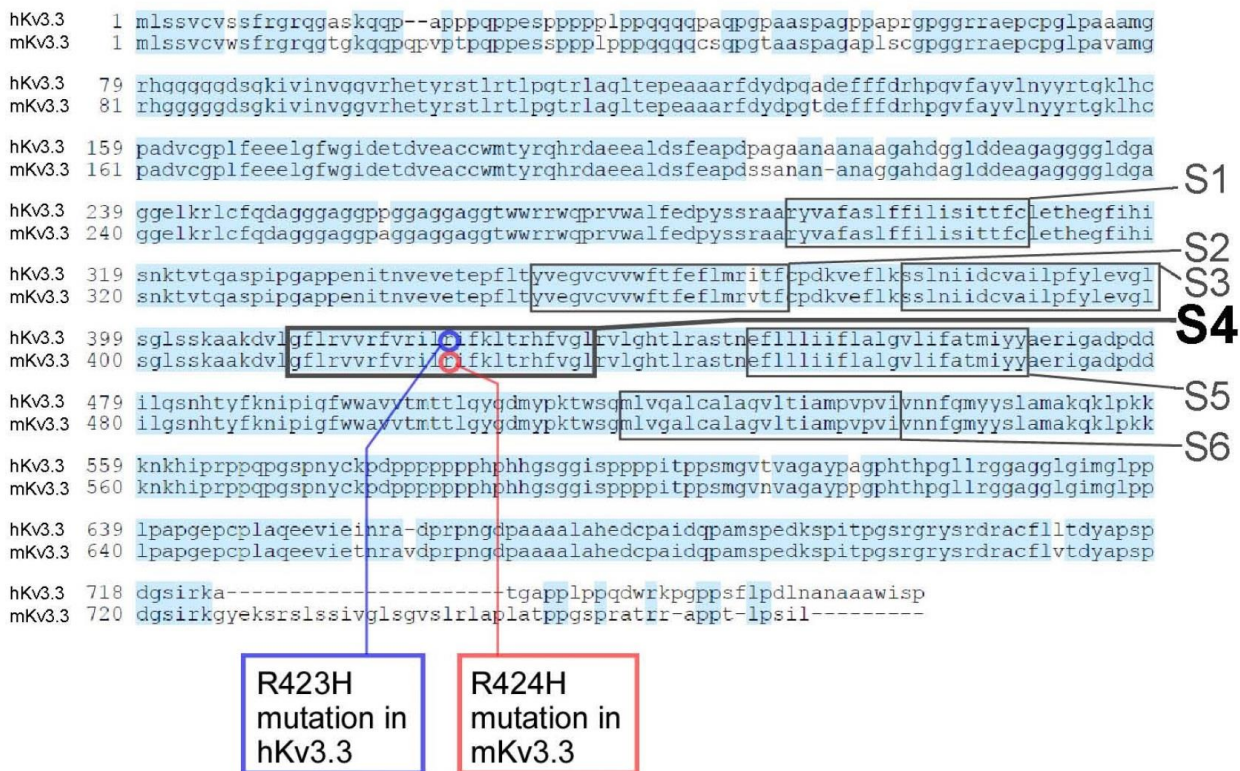

**Supplemental Figure S1. Amino acid sequence alignment of hKv3.3 (accession number AF022150) with the mKv3.3 used in this experiment**

The two sequences were aligned using Clone Manager 6 software (Scientific & Educational Software, Cary, NC). Hyphens represent gaps introduced to optimize the alignment. The six transmembrane domains are surrounded by squares. Residues conserved between hKv3.3 and mKv3.3 are colored blue.

## Supplemental Fig. S2

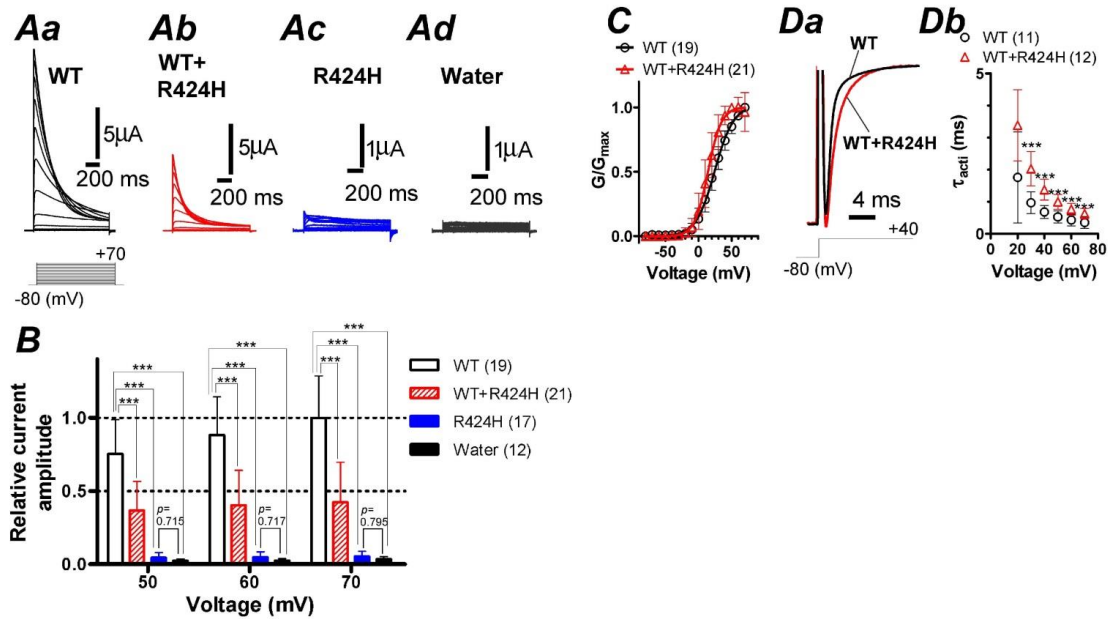

### Supplemental Figure S2. R424H mutant subunits work as a dominant-negative on WT mKv3.3 channels expressed in *Xenopus oocytes*

A, Representative traces evoked by stepping from  $-80$  mV holding potential to voltages ranging from  $-70$  to  $+70$  mV in 10-mV increments. cRNA of WT mKv3.3 (Aa, WT), a mixture of WT and R424H mutant subunits at 1:1 ratio (Ab, WT+R424H), R424H mutant subunits (Ac, R424H), or nuclease-free water (Ad, Water) was injected into *Xenopus oocytes*.

B, Summary of the mean relative current amplitude. The amplitude was calculated from peak amplitude normalized by mean peak amplitude of WT-expressing oocytes at  $+70$  mV voltage pulse.

C, Normalized conductance ( $G$ ) of WT-expressing and WT+R424H-expressing oocytes are plotted as a function of voltage.  $G$  was obtained by dividing peak current by electrochemical driving force:  $[G = I_K/(V - E_K)]$ . The activation ( $G/G_{max}$ ) curves were fit with the Boltzmann function,  $G/G_{max} = 1/[1 + \exp(V_{1/2} - V)/k]$ .

D, Comparison of activation  $\tau$  between WT-expressing and WT+R424H mutant-expressing oocytes. Da, Representative traces evoked by stepping from  $-80$  mV holding potential to  $+40$  mV. The current traces are scaled to the same peak amplitude to compare the activation kinetics. Db, Comparison of  $\tau_{acti}$  of WT mKv3.3 with that of WT+R424H mutant channels in *Xenopus oocytes*.  $\tau_{acti}$  was obtained by fitting current traces with a single exponential function on the rising phases of the traces.

## Supplemental Fig. S3

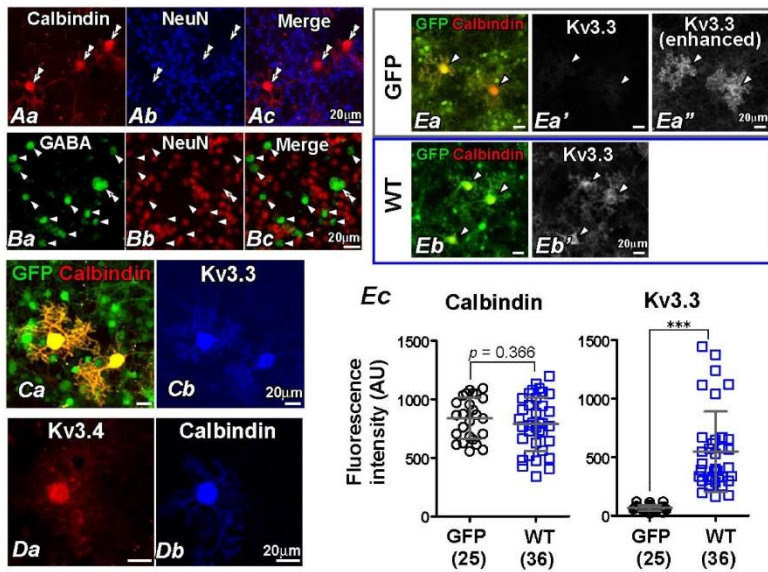

### Supplemental Figure S3. Immunohistochemical characterization of mouse cerebellar cultures

A, Cerebellar cultures double-immunostained with anti-Calbindin and anti-NeuN antibodies at DIV 14. PCs (Calbindin-positive cells in *Aa*, double arrowheads) were NeuN-negative (*Ab* and *Ac*). *B*, Cultures double-immunostained with anti-GABA and anti-NeuN antibodies at DIV 16. GABAergic interneurons (GABA-positive small cells in *Ba* and *Bc*, arrowheads) were also NeuN-negative. Double arrowheads in *Ba* and *Bc* indicate a putative PC. *C*, Cultures triple-immunostained with anti-GFP, anti-Calbindin, and anti-Kv3.3 antibodies at DIV 14. PCs but not other cerebellar

neurons expressed mKv3.3 channels. In *C*, GFP-expressing cerebellar cultures were used to visualize the neurons. *D*, Cerebellar cultures double-immunostained with anti-Kv3.4 and anti-Calbindin antibodies, showing the expression of Kv3.4 in PCs. *E*, Immunofluorescence images of cerebellar cultures infected with lentiviral vectors expressing GFP (*Ea-Ea''*) or WT subunits (*Eb* and *Eb'*). The cultures were double-immunostained with anti-GFP and anti-Kv3.3 antibodies. The fluorescence images were taken in the same conditions for the quantitative analysis. PCs are indicated by arrowheads. Panel *Ea''* is a contrast-enhanced image of *Ea'* that shows faint but some expression of endogenous mKv3.3 in PCs expressing GFP alone. *Ec*, Quantitative analysis of immunofluorescence intensity for Calbindin and Kv3.3. AU, arbitrary unit. In *A-E*, The following primary and secondary antibodies were used. Primary antibodies: mouse monoclonal anti-Calbindin antibody (*A*, *C*, and *D*, 1:2,000-diluted, No.300, Swant; Bellinzona, Switzerland), mouse monoclonal anti-NeuN antibody (*A* and *B*, 1:2,000-diluted), and rabbit polyclonal anti-GABA antibody (*B*, 1:1,000-diluted, A2052; Sigma-Aldrich), guinea pig polyclonal anti-GFP antibody (*C* and *E*, 1:1,000-diluted), and rabbit polyclonal anti-Kv3.3 antibody [*C* and *E*, 1:2,000-diluted, APC-102; Alomone labs, Jerusalem, Israel; This antibody is raised from the peptide KSPITPGSRGRYSRDRAC corresponding with residues 701-718 of rat Kv3.3a channels, which have a sequence that is identical to 692-709 of the mKv3.3 channels (Chang *et al.*, 2007)]. Secondary antibodies: AF 568-conjugated goat anti-rabbit IgG antibody (3A), AF 680-conjugated goat anti-mouse IgG antibody (*A* and *D*), AF 488-conjugated goat anti-rabbit IgG antibody (*B*, A-11008; Invitrogen), AF 568-conjugated goat anti-mouse IgG antibody (*B*, *C*, and *E*, A-11031; Invitrogen), AF 488-conjugated goat anti-guinea pig IgG antibody (*C* and *E*), AF 680-conjugated goat anti-rabbit IgG antibody (*C* and *E*, A-21109; Invitrogen). All secondary antibodies were used at the concentration of 5  $\mu$ g/ml. The incubation conditions were same as Fig. 2. For immunolabeling of Kv3.4 protein in cerebellar cultures (*D*), goat serum was excluded from the incubation buffer. Cerebellar cultures were immunolabeled with goat polyclonal anti-hKv3.4 antibody (1:500-diluted, sc-104343; Santa Cruz Biotechnology, Santa Cruz, CA) and mouse monoclonal anti-Calbindin antibody, and then with AF 568-conjugated donkey anti-goat IgG antibody (A-11057; Invitrogen). After blocking with the incubation buffer containing 10% normal goat serum, the cultures were further incubated with AF 680-conjugated goat anti-mouse IgG antibody.

## Supplemental Fig. S4

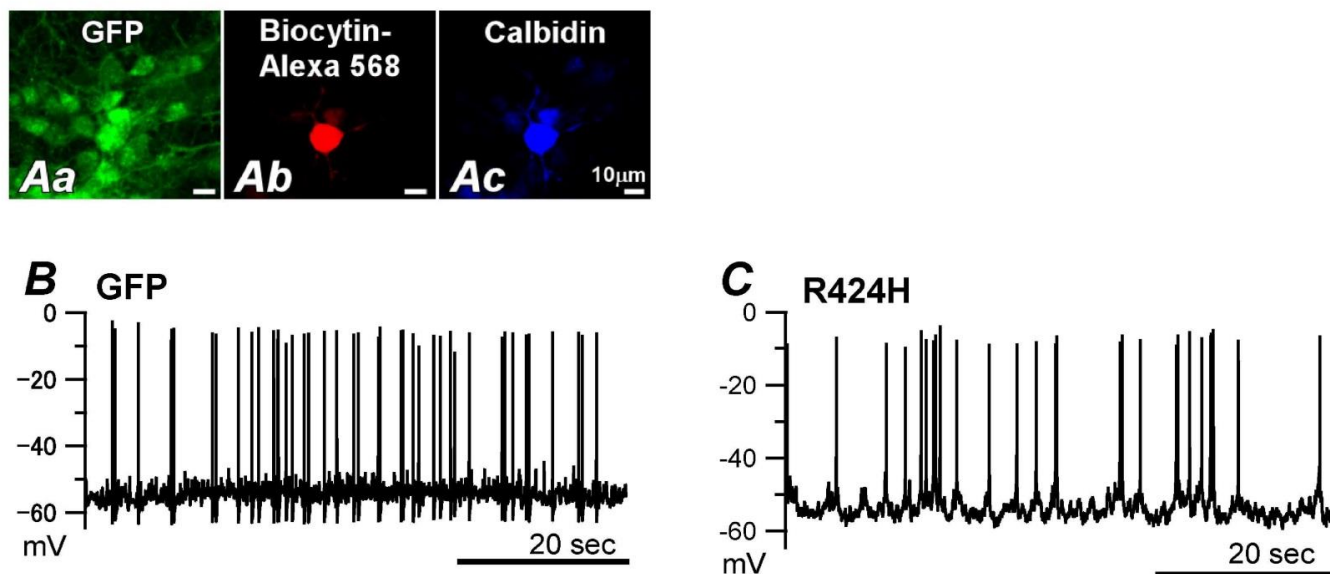

### Supplemental Figure S4. Recordings of spontaneous action potentials from PCs

A, Immunohistochemical identification of PCs. PCs were stained intracellularly with biocytin infused via patch pipettes, fixed in 4% (w/v) formaldehyde, and incubated with mouse monoclonal anti-Calbindin antibody and guinea pig polyclonal anti-GFP antibody. The samples were further incubated with AF 568 streptavidin (S-11226, Invitrogen), AF 488-conjugated goat anti-guinea pig IgG antibody, and AF 680-conjugated goat anti-mouse IgG antibody. The incubation conditions were the same as in Fig. 2. B and C, Representative spontaneous firing recorded from GFP-expressing PC (B) and R424H mutant-expressing PC (C) at DIV 8.

## Supplemental Fig. S5

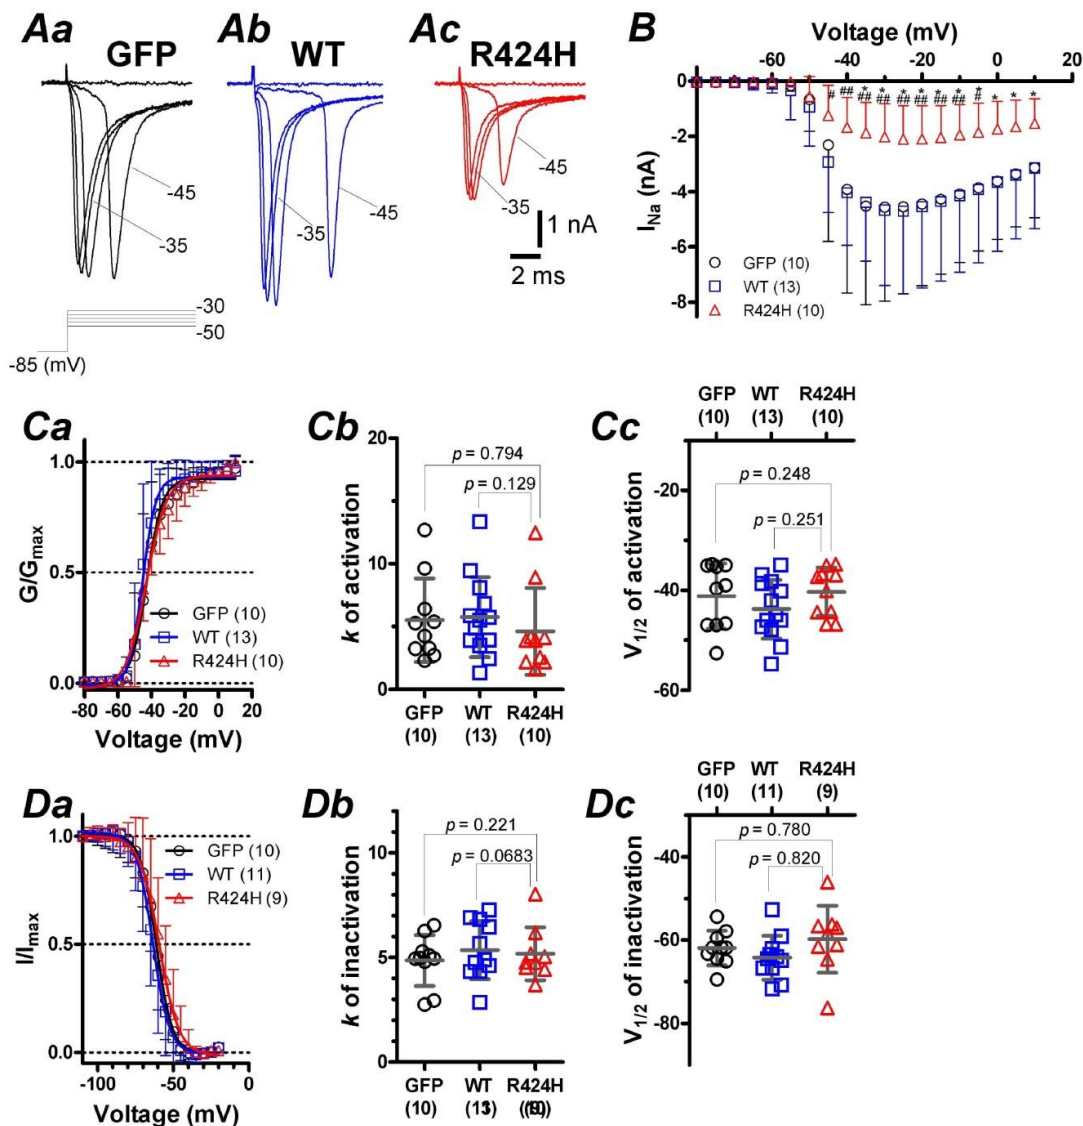

### Supplemental Figure S5. Comparison of $I_{Na}$ recorded under the whole-cell configuration

$I_{Na}$  was recorded in HEPES-buffered ACSF in which 140 NaCl (in mM) was replaced with 117 NaCl, 22 TEA-Cl, 3 CsCl, and 2 4-aminopyridine, 0.2 CdCl<sub>2</sub>, 0.1 picrotoxin, and 0.02 DNQX; RT (20–22°C). A CsCl-based internal solution was used (in mM): 140 CsCl, 10 NaCl, 0.2 EGTA, 10 biocytin, and 10 HEPES (pH 7.3 with CsOH,  $E_{Na} = 63.4$  mV). The liquid junction potential (–5 mV) was corrected off-line. *A*, Representative traces of  $I_{Na}$  activated with 50-ms voltage steps from –85 mV to voltages ranging from –50 to –30 mV in 5-mV increments. The leak currents were subtracted on-line the p/4 protocol and the  $I_{Na}$  was confirmed by application of TTX (0.001 mM, data not shown). *B*, The current-voltage relation of peak  $I_{Na}$ . In this figure, an asterisk (\*) indicates statistical significance between GFP alone and R424H mutant, and a number sign (#) between WT mKv3.3 and R424H. \* $p < 0.05$ , # $p < 0.05$ , and ### $p < 0.01$ . *Ca*, The conductance-voltage relations, which were obtained in the same way as those in Supplemental Fig. S2C.  $E_{Na}$  was used for the equilibrium potential. *Cb* and *Cc*,  $k$  (*Cb*) and  $V_{1/2}$  (*Cc*) of activation for R424H mutant-expressing PCs did not show significant difference compared to those for the control group. *D*, The steady-state inactivation was determined by holding cells at –85 mV before applying a 200-ms pre-pulse to potentials between –125 and –20 mV in 5-mV increments, followed by a 100-ms test pulse to –20 mV. *Da*, Steady-state inactivation curves were obtained in the same way as those in Fig. 1Bc. *Db* and *Dc*,  $k$  (*Db*) and  $V_{1/2}$  (*Dc*) for R424H mutant-expressing PCs did not show significant difference compared to those for the control group.
